# Supplementary material
Source: MDPI journal article supplement (https://www.mdpi.com/2071-1050/11/11/3107)

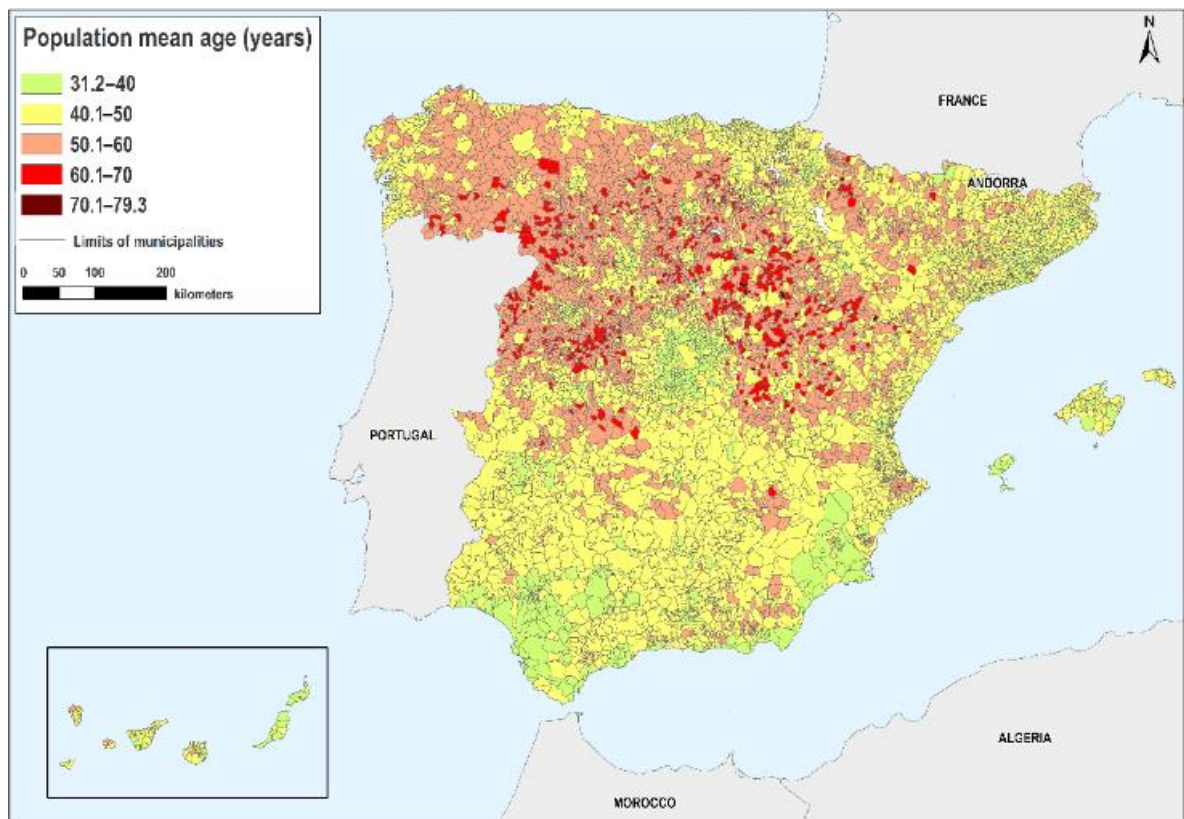

**Figure S1.** Map of mean age of populations of Spain municipalities (2016).

Supplement: s1 [file s1]
